# Supplementary material
Source: PubMed Central journal article supplement (PMC5683355)
Supplement: NIHMS74785-supplement-Appendix.pdf [file NIHMS74785-supplement-Appendix.pdf]

## Appendix A: Possible line emission contamination from the telescope side lobes

In order to determine whether or not the emission from the bright Orion BN/KL region contributes to our detected signal, we compared the 1 mm spectrum of the Orion Bar with that of Orion BN/KL (located at  $\sim 2'$  north of the Bar, e.g. Tercero et al. 2010). Figure A.1 shows several  $\text{H}_2\text{CS}$  and  $\text{CH}_3\text{OH}$  lines observed towards the Bar (black histogram) and Orion BN/KL (red histogram; see Tercero et al. 2010, 2015). We note that the amplitude of Orion BN/KL spectra are divided by a given value to match the line intensities from the Bar. This comparison shows that while the line emission from the Orion Bar peaks at  $v_{\text{LSR}} \approx 10.7 \text{ km s}^{-1}$ , and can be fully attributed to gas in the PDR (Goicoechea et al. 2016), the blue-shifted shoulder emission seen in some lines at  $\sim 8 \text{ km s}^{-1}$  is likely produced by the intense emission from Orion BN/KL, and perhaps by the extended Orion cloud component (for the low-excitation lines). This emission is detected through the telescope extended side lobes and results in a blue-shifted emission shoulder in some spectra towards the Bar. For the IRAM 30 m telescope, the contribution of the secondary lobes increases with frequency (Greve et al. 1998). Given the specific emission velocity and narrow line widths of the emission from the Bar, and the fact that this effect is stronger at  $\sim 1 \text{ mm}$ , we conclude that our line assignments and line intensity extraction in the PDR is correct.

## Appendix B: Identified lines of complex organic molecules

A summary of the main line spectroscopic parameters is presented in Tables B.1-B.11. Line frequency (in MHz), energy of the upper level of each transition ( $E_u/k$  in K), Einstein coefficient for spontaneous emission ( $A_{ul}$  in  $\text{s}^{-1}$ ), intrinsic line strength ( $S_{ul}$ ), and the level degeneracy ( $g_u$ ) from MADEX spectral catalogue, and JPL and CDMS molecular databases are shown. The velocity-integrated line intensity ( $\int T_{\text{MB}} dv$  in  $\text{mK km s}^{-1}$ ), LSR velocity ( $v_{\text{LSR}}$  in  $\text{km s}^{-1}$ ), FWHM line width ( $\Delta v$  in  $\text{km s}^{-1}$ ), and the line peak temperature ( $T_{\text{MB}}$  in mK) were obtained from Gaussian fits. Parentheses indicate the uncertainty. When two or more transitions were found to overlap, the total profile was fitted. Fully overlapping transitions are marked with connecting symbols in the tables.

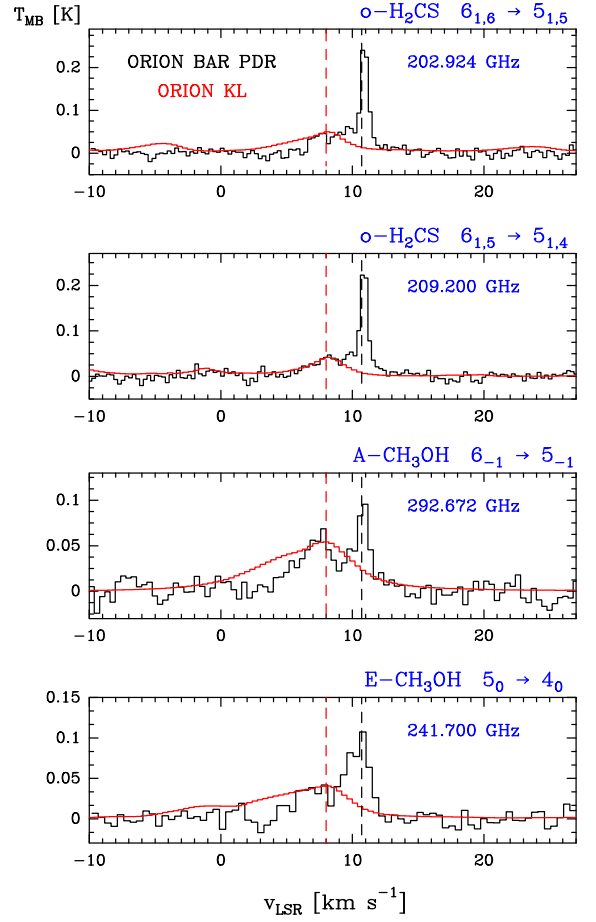

**Fig. A.1.** Orion Bar spectra (black) at different frequencies in the 1 mm range. For each line, the spectrum towards Orion BN/KL is also shown in red (Tercero et al. 2010, 2015). The  $\text{CH}_3\text{OH}$  spectra towards Orion BN/KL have been divided by  $\sim 400$ , and the  $\text{H}_2\text{CS}$  spectra by  $\sim 200$ . The black and red dashed lines indicate the LSR velocity of the Orion Bar PDR ( $10.7 \text{ km s}^{-1}$ ) and Orion extended ridge and/or south hot core ( $\sim 8 \text{ km s}^{-1}$ , see e.g. Cernicharo et al. 2016), respectively.

**Table B.1.** Line parameters of HCO.

| Transition<br>( $N_{K_a, K_c}, J, F$ ) <sub>u</sub> → ( $N_{K_a, K_c}, J, F$ ) <sub>l</sub> | Frequency<br>[MHz]      | $E_u/k$<br>[K] | $A_{ul}$<br>[s <sup>-1</sup> ] | $S_{ul}$ | $g_u$ | $\int T_{MB} dv$<br>[mK km s <sup>-1</sup> ] | $v_{LSR}$<br>[km s <sup>-1</sup> ] | $\Delta v$<br>[km s <sup>-1</sup> ] | $T_{MB}$<br>[mK] | $S/N$ |
|---------------------------------------------------------------------------------------------|-------------------------|----------------|--------------------------------|----------|-------|----------------------------------------------|------------------------------------|-------------------------------------|------------------|-------|
| 1 <sub>0,1</sub> , 3/2, 2 → 0 <sub>0,0</sub> , 1/2, 1                                       | 86670.760 <sup>F</sup>  | 4.2            | 4.68 × 10 <sup>-6</sup>        | 1.66     | 5     | 497(12)                                      | 10.5(<0.1)                         | 3.1(0.1)                            | 149              | 52    |
| 1 <sub>0,1</sub> , 3/2, 1 → 0 <sub>0,0</sub> , 1/2, 0                                       | 86708.360 <sup>F</sup>  | 4.2            | 4.59 × 10 <sup>-6</sup>        | 0.98     | 3     | 286(7)                                       | 10.5(<0.1)                         | 2.8(0.1)                            | 95               | 33    |
| 1 <sub>0,1</sub> , 1/2, 1 → 0 <sub>0,0</sub> , 1/2, 1                                       | 86777.460 <sup>F</sup>  | 4.2            | 4.60 × 10 <sup>-6</sup>        | 0.98     | 3     | 294(7)                                       | 10.5(<0.1)                         | 3.0(0.1)                            | 92               | 32    |
| 1 <sub>0,1</sub> , 1/2, 0 → 0 <sub>0,0</sub> , 1/2, 1                                       | 86805.780 <sup>F</sup>  | 4.2            | 4.71 × 10 <sup>-6</sup>        | 0.33     | 1     | 75(6)                                        | 10.5(0.1)                          | 2.3(0.2)                            | 31               | 10    |
| 2 <sub>0,2</sub> , 5/2, 3 → 1 <sub>0,1</sub> , 3/2, 2                                       | 173377.377 <sup>W</sup> | 12.5           | 4.50 × 10 <sup>-5</sup>        | 2.80     | 7     | 683(86)                                      | —                                  | —                                   | —                | 8     |
| 2 <sub>0,2</sub> , 5/2, 2 → 1 <sub>0,1</sub> , 3/2, 1                                       | 173406.082 <sup>W</sup> | 12.5           | 4.42 × 10 <sup>-5</sup>        | 1.96     | 5     | 346(70)                                      | —                                  | —                                   | —                | 6     |
| 2 <sub>0,2</sub> , 3/2, 2 → 1 <sub>0,1</sub> , 1/2, 1                                       | 173443.065 <sup>W</sup> | 12.5           | 3.38 × 10 <sup>-5</sup>        | 1.50     | 5     | 409(94)                                      | —                                  | —                                   | —                | 5     |
| 2 <sub>0,2</sub> , 3/2, 1 → 1 <sub>0,1</sub> , 1/2, 0                                       | 173474.400 <sup>W</sup> | 12.5           | 2.50 × 10 <sup>-5</sup>        | 0.66     | 3     | 185(79)                                      | —                                  | —                                   | —                | 4     |
| 3 <sub>0,3</sub> , 7/2, 4 → 2 <sub>0,2</sub> , 5/2, 3                                       | 260060.329 <sup>F</sup> | 25.0           | 1.63 × 10 <sup>-4</sup>        | 3.85     | 9     | 576(15)                                      | 10.5(<0.1)                         | 2.0(0.1)                            | 275              | 23    |
| 3 <sub>0,3</sub> , 7/2, 3 → 2 <sub>0,2</sub> , 5/2, 2                                       | 260082.192 <sup>F</sup> | 25.0           | 1.60 × 10 <sup>-4</sup>        | 2.95     | 7     | 446(15)                                      | 10.5(<0.1)                         | 2.0(0.1)                            | 209              | 16    |
| 3 <sub>0,3</sub> , 5/2, 3 → 2 <sub>0,2</sub> , 3/2, 2                                       | 260133.586 <sup>F</sup> | 25.0           | 1.45 × 10 <sup>-4</sup>        | 2.67     | 7     | 347(17)                                      | 10.6(<0.1)                         | 1.7(0.4)                            | 195              | 15    |
| 3 <sub>0,3</sub> , 5/2, 2 → 2 <sub>0,2</sub> , 3/2, 1                                       | 260155.769 <sup>W</sup> | 25.0           | 1.37 × 10 <sup>-4</sup>        | 1.80     | 5     | 382(25)                                      | —                                  | —                                   | —                | 19    |
| 4 <sub>0,4</sub> , 9/2, 5 → 3 <sub>0,3</sub> , 7/2, 4                                       | 346708.493 <sup>F</sup> | 41.6           | 3.99 × 10 <sup>-4</sup>        | 4.88     | 11    | 437(38)                                      | 10.6(0.1)                          | 2.6(0.3)                            | 156              | 7     |
| 4 <sub>0,4</sub> , 9/2, 4 → 3 <sub>0,3</sub> , 7/2, 3                                       | 346725.172 <sup>F</sup> | 41.6           | 3.95 × 10 <sup>-4</sup>        | 3.95     | 9     | 308(36)                                      | 10.6(0.1)                          | 2.0(0.3)                            | 142              | 7     |
| 4 <sub>0,4</sub> , 7/2, 4 → 3 <sub>0,3</sub> , 5/2, 3                                       | 346787.898 <sup>F</sup> | 41.6           | 3.76 × 10 <sup>-4</sup>        | 3.76     | 9     | 362(41)                                      | 10.5(0.2)                          | 3.0(0.5)                            | 112              | 6     |
| 4 <sub>0,4</sub> , 7/2, 3 → 3 <sub>0,3</sub> , 5/2, 2                                       | 346804.597 <sup>F</sup> | 41.6           | 3.67 × 10 <sup>-4</sup>        | 2.85     | 7     | 223(29)                                      | 10.6(0.1)                          | 1.6(0.3)                            | 127              | 7     |

**Notes.** Frequencies,  $E_u/k$ ,  $A_{ul}$ ,  $S_{ul}$ , and  $g_u$  from JPL catalogue. **Labels:** <sup>F</sup> Detected with FTS backend. <sup>W</sup> The lines detected with WILMA backend just give information about the integrated line intensity (see Cuadrado et al. 2015). \* Symmetry (ortho-para or E-A).

**Table B.2.** Line parameters of H<sub>2</sub>CO.

| Transition<br>( $J_{K_a, K_c}$ ) <sub>u</sub> → ( $J_{K_a, K_c}$ ) <sub>l</sub> | Sym.*        | Frequency<br>[MHz]      | $E_u/k$<br>[K] | $A_{ul}$<br>[s <sup>-1</sup> ] | $S_{ul}$ | $g_u$ | $\int T_{MB} dv$<br>[mK km s <sup>-1</sup> ] | $v_{LSR}$<br>[km s <sup>-1</sup> ] | $\Delta v$<br>[km s <sup>-1</sup> ] | $T_{MB}$<br>[mK] | $S/N$ |
|---------------------------------------------------------------------------------|--------------|-------------------------|----------------|--------------------------------|----------|-------|----------------------------------------------|------------------------------------|-------------------------------------|------------------|-------|
| 2 <sub>1,2</sub> → 1 <sub>1,1</sub>                                             | <i>ortho</i> | 140839.516 <sup>W</sup> | 6.8            | 5.30 × 10 <sup>-5</sup>        | 1.5      | 5     | 13488(28)                                    | —                                  | —                                   | —                | 423   |
| 2 <sub>0,2</sub> → 1 <sub>0,1</sub>                                             | <i>para</i>  | 145602.951 <sup>W</sup> | 10.5           | 7.80 × 10 <sup>-5</sup>        | 2.0      | 5     | 5611(67)                                     | —                                  | —                                   | —                | 95    |
| 2 <sub>1,1</sub> → 1 <sub>1,0</sub>                                             | <i>ortho</i> | 150498.335 <sup>W</sup> | 7.5            | 6.46 × 10 <sup>-5</sup>        | 1.5      | 5     | 10850(97)                                    | —                                  | —                                   | —                | 208   |
| 3 <sub>1,3</sub> → 2 <sub>1,2</sub>                                             | <i>ortho</i> | 211211.449 <sup>F</sup> | 16.9           | 2.27 × 10 <sup>-4</sup>        | 2.7      | 7     | 13732(26)                                    | 10.6(0.1)                          | 2.3(0.1)                            | 5519             | 338   |
| 3 <sub>0,3</sub> → 2 <sub>0,2</sub>                                             | <i>para</i>  | 218222.187 <sup>F</sup> | 21.0           | 2.81 × 10 <sup>-4</sup>        | 3.0      | 7     | 6567(22)                                     | 10.6(0.1)                          | 2.2(0.1)                            | 2771             | 311   |
| 3 <sub>2,2</sub> → 2 <sub>2,1</sub>                                             | <i>para</i>  | 218475.634 <sup>F</sup> | 68.1           | 1.57 × 10 <sup>-4</sup>        | 1.7      | 7     | 2600(9)                                      | 10.7(0.1)                          | 2.1(0.1)                            | 1148             | 175   |
| 3 <sub>2,1</sub> → 2 <sub>2,0</sub>                                             | <i>para</i>  | 218760.062 <sup>F</sup> | 68.1           | 1.58 × 10 <sup>-4</sup>        | 1.7      | 7     | 2582(12)                                     | 10.7(0.1)                          | 2.1(0.1)                            | 1145             | 151   |
| 3 <sub>1,2</sub> → 2 <sub>1,1</sub>                                             | <i>ortho</i> | 225697.772 <sup>F</sup> | 18.3           | 2.77 × 10 <sup>-4</sup>        | 2.7      | 7     | 11382(39)                                    | 10.6(0.1)                          | 2.4(0.1)                            | 4537             | 269   |
| 4 <sub>1,4</sub> → 3 <sub>1,3</sub>                                             | <i>ortho</i> | 281526.919 <sup>F</sup> | 30.4           | 5.87 × 10 <sup>-4</sup>        | 3.8      | 9     | 15275(49)                                    | 10.5(0.1)                          | 2.4(0.1)                            | 6032             | 409   |
| 4 <sub>2,3</sub> → 3 <sub>2,2</sub>                                             | <i>para</i>  | 291237.765 <sup>F</sup> | 82.1           | 5.20 × 10 <sup>-4</sup>        | 3.0      | 9     | 2870(19)                                     | 10.6(0.1)                          | 2.1(0.1)                            | 1266             | 100   |
| 4 <sub>3,2</sub> → 3 <sub>3,1</sub>                                             | <i>ortho</i> | 291380.441 <sup>F</sup> | 125.8          | 3.04 × 10 <sup>-4</sup>        | 1.8      | 9     | 3815(19)                                     | 10.6(0.1)                          | 2.0(0.1)                            | 1755             | 138   |
| 4 <sub>3,1</sub> → 3 <sub>3,0</sub>                                             | <i>ortho</i> | 291384.360 <sup>F</sup> | 125.8          | 3.04 × 10 <sup>-4</sup>        | 1.8      | 9     | 4282(21)                                     | 10.7(0.1)                          | 2.3(0.1)                            | 1744             | 138   |
| 4 <sub>2,2</sub> → 3 <sub>2,1</sub>                                             | <i>para</i>  | 291948.066 <sup>F</sup> | 82.1           | 5.24 × 10 <sup>-4</sup>        | 3.0      | 9     | 2863(19)                                     | 10.6(0.1)                          | 2.2(0.1)                            | 1244             | 101   |
| 4 <sub>1,3</sub> → 3 <sub>1,2</sub>                                             | <i>ortho</i> | 300836.630 <sup>F</sup> | 32.7           | 7.17 × 10 <sup>-4</sup>        | 3.8      | 9     | 9897(49)                                     | 10.7(0.1)                          | 2.5(0.1)                            | 3668             | 135   |
| 5 <sub>1,5</sub> → 4 <sub>1,4</sub>                                             | <i>ortho</i> | 351768.637 <sup>F</sup> | 47.3           | 1.20 × 10 <sup>-3</sup>        | 4.8      | 11    | 8551(88)                                     | 10.7(0.1)                          | 2.4(0.1)                            | 3294             | 61    |

**Notes.** Frequencies,  $E_u/k$ ,  $A_{ul}$ ,  $S_{ul}$ , and  $g_u$  from MADEX code, that fit to all rotational lines reported by Bocquet et al. (1996), Brünken et al. (2003), and Eliet et al. (2012).

**Table B.3.** Line parameters of H<sub>2</sub><sup>13</sup>CO.

| Transition<br>( $J_{K_a, K_c})_u \rightarrow (J_{K_a, K_c})_l$ | Sym.*        | Frequency<br>[MHz]      | $E_u/k$<br>[K] | $A_{ul}$<br>[s <sup>-1</sup> ] | $S_{ul}$ | $g_u$ | $\int T_{MB} dv$<br>[mK km s <sup>-1</sup> ] | $v_{LSR}$<br>[km s <sup>-1</sup> ] | $\Delta v$<br>[km s <sup>-1</sup> ] | $T_{MB}$<br>[mK] | $S/N$ |
|----------------------------------------------------------------|--------------|-------------------------|----------------|--------------------------------|----------|-------|----------------------------------------------|------------------------------------|-------------------------------------|------------------|-------|
| 2 <sub>1,2</sub> → 1 <sub>1,1</sub>                            | <i>ortho</i> | 137449.954 <sup>W</sup> | 6.6            | $4.92 \times 10^{-5}$          | 1.5      | 5     | 298(53)                                      | —                                  | —                                   | —                | 7     |
| 2 <sub>1,1</sub> → 1 <sub>1,0</sub>                            | <i>ortho</i> | 146635.669 <sup>W</sup> | 7.3            | $5.98 \times 10^{-5}$          | 1.5      | 5     | 73(29)                                       | —                                  | —                                   | —                | 5     |
| 3 <sub>1,3</sub> → 2 <sub>1,2</sub>                            | <i>ortho</i> | 206131.619 <sup>F</sup> | 16.5           | $2.11 \times 10^{-4}$          | 2.6      | 7     | 251(12)                                      | 10.5(0.1)                          | 2.4(0.1)                            | 97               | 11    |
| 3 <sub>0,3</sub> → 2 <sub>0,2</sub>                            | <i>para</i>  | 212811.190 <sup>F</sup> | 20.4           | $2.61 \times 10^{-4}$          | 3.0      | 7     | 84(13)                                       | 10.3(0.1)                          | 2.1(0.4)                            | 37               | 4     |
| 3 <sub>1,2</sub> → 2 <sub>1,1</sub>                            | <i>ortho</i> | 219908.481 <sup>F</sup> | 17.8           | $2.56 \times 10^{-4}$          | 2.7      | 7     | 151(12)                                      | 10.7(0.1)                          | 2.0(0.2)                            | 70               | 7     |
| 4 <sub>1,4</sub> → 3 <sub>1,3</sub>                            | <i>ortho</i> | 274762.103 <sup>F</sup> | 29.7           | $5.46 \times 10^{-4}$          | 3.8      | 9     | 180(16)                                      | 10.8(0.1)                          | 2.3(0.3)                            | 74               | 6     |
| 4 <sub>0,4</sub> → 3 <sub>0,3</sub>                            | <i>para</i>  | 283441.868 <sup>F</sup> | 34.0           | $6.39 \times 10^{-4}$          | 4.0      | 9     | 32(13)                                       | 10.7(0.2)                          | 0.9(0.5)                            | 33               | 4     |
| 4 <sub>1,3</sub> → 3 <sub>1,2</sub>                            | <i>ortho</i> | 293126.495 <sup>F</sup> | 31.9           | $6.63 \times 10^{-4}$          | 3.8      | 9     | 140(13)                                      | 10.5(0.1)                          | 2.3(0.3)                            | 58               | 6     |

**Notes.** Frequencies,  $E_u/k$ ,  $A_{ul}$ ,  $S_{ul}$ , and  $g_u$  from MADEX code, that fit to all rotational lines reported by Müller et al. (2000).

**Table B.4.** Line parameters of H<sub>2</sub>CS.

| Transition<br>( $J_{K_a, K_c})_u \rightarrow (J_{K_a, K_c})_l$ | Sym.*        | Frequency<br>[MHz]      | $E_u/k$<br>[K] | $A_{ul}$<br>[s <sup>-1</sup> ] | $S_{ul}$ | $g_u$ | $\int T_{MB} dv$<br>[mK km s <sup>-1</sup> ] | $v_{LSR}$<br>[km s <sup>-1</sup> ] | $\Delta v$<br>[km s <sup>-1</sup> ] | $T_{MB}$<br>[mK] | $S/N$ |
|----------------------------------------------------------------|--------------|-------------------------|----------------|--------------------------------|----------|-------|----------------------------------------------|------------------------------------|-------------------------------------|------------------|-------|
| 3 <sub>1,3</sub> → 2 <sub>1,2</sub>                            | <i>ortho</i> | 101477.810 <sup>F</sup> | 8.1            | $1.26 \times 10^{-5}$          | 2.67     | 7     | 79(8)                                        | 10.8(0.1)                          | 1.1(0.1)                            | 68               | 10    |
| 3 <sub>2,2</sub> → 2 <sub>2,1</sub>                            | <i>para</i>  | 103039.907 <sup>F</sup> | 62.6           | $8.25 \times 10^{-6}$          | 1.67     | 7     | } 53(5)                                      | 10.9(0.1)                          | 1.8(0.2)                            | 28               | 9     |
| 3 <sub>0,3</sub> → 2 <sub>0,2</sub>                            | <i>para</i>  | 103040.452 <sup>F</sup> | 9.9            | $1.48 \times 10^{-5}$          | 3.00     | 7     |                                              | 19(7)                              | 10.5(0.3)                           | 1.5(1.3)         | 10    |
| 3 <sub>2,1</sub> → 2 <sub>2,0</sub>                            | <i>para</i>  | 103051.847 <sup>F</sup> | 62.6           | $8.25 \times 10^{-6}$          | 1.67     | 7     | 85(5)                                        | 10.7(<0.1)                         | 1.3(0.1)                            | 59               | 14    |
| 3 <sub>1,2</sub> → 2 <sub>1,1</sub>                            | <i>ortho</i> | 104617.040 <sup>F</sup> | 8.4            | $1.38 \times 10^{-5}$          | 2.67     | 7     | 182(18)                                      | —                                  | —                                   | —                | 2     |
| 4 <sub>0,4</sub> → 3 <sub>0,3</sub>                            | <i>para</i>  | 137371.210 <sup>W</sup> | 16.5           | $3.65 \times 10^{-5}$          | 4.00     | 9     | 149(22)                                      | —                                  | —                                   | —                | 4     |
| 4 <sub>1,3</sub> → 3 <sub>1,2</sub>                            | <i>ortho</i> | 139483.682 <sup>W</sup> | 15.1           | $3.58 \times 10^{-5}$          | 3.75     | 9     | 229(35)                                      | —                                  | —                                   | —                | 10    |
| 5 <sub>1,5</sub> → 4 <sub>1,4</sub>                            | <i>ortho</i> | 169114.079 <sup>W</sup> | 22.7           | $6.68 \times 10^{-5}$          | 4.80     | 11    | 1447(217)                                    | —                                  | —                                   | —                | 9     |
| 5 <sub>0,5</sub> → 4 <sub>0,4</sub>                            | <i>para</i>  | 171688.117 <sup>W</sup> | 24.7           | $7.28 \times 10^{-5}$          | 5.00     | 11    | 300(106)                                     | —                                  | —                                   | —                | 3     |
| 5 <sub>1,4</sub> → 4 <sub>1,3</sub>                            | <i>ortho</i> | 174345.223 <sup>W</sup> | 23.5           | $7.32 \times 10^{-5}$          | 4.80     | 11    | 206(10)                                      | 10.9(<0.1)                         | 0.8(0.1)                            | 245              | 18    |
| 6 <sub>0,6</sub> → 5 <sub>0,5</sub>                            | <i>para</i>  | 205987.858 <sup>F</sup> | 34.6           | $1.28 \times 10^{-4}$          | 6.00     | 13    | 75(7)                                        | 10.9(<0.1)                         | 0.7(0.1)                            | 104              | 10    |
| 6 <sub>3,4</sub> → 5 <sub>3,3</sub>                            | <i>ortho</i> | 206052.602 <sup>F</sup> | 138.3          | $9.59 \times 10^{-5}$          | 4.50     | 13    | } 76(14)                                     | 10.9(0.1)                          | 1.3(0.4)                            | 55               | 5     |
| 6 <sub>3,3</sub> → 5 <sub>3,2</sub>                            | <i>ortho</i> | 206052.602 <sup>F</sup> | 138.3          | $9.59 \times 10^{-5}$          | 4.50     | 13    |                                              | 48(7)                              | 10.9(0.1)                           | 1.0(0.1)         | 47    |
| 6 <sub>2,4</sub> → 5 <sub>2,3</sub>                            | <i>para</i>  | 206158.602 <sup>F</sup> | 87.3           | $1.14 \times 10^{-4}$          | 5.33     | 13    | 190(9)                                       | 10.9(<0.1)                         | 0.8(0.1)                            | 231              | 17    |
| 6 <sub>1,5</sub> → 5 <sub>1,4</sub>                            | <i>ortho</i> | 209200.620 <sup>F</sup> | 33.5           | $1.30 \times 10^{-4}$          | 5.83     | 13    | 105(14)                                      | 10.9(<0.1)                         | 0.5(0.1)                            | 185              | 7     |
| 7 <sub>1,7</sub> → 6 <sub>1,6</sub>                            | <i>ortho</i> | 236727.020 <sup>F</sup> | 43.8           | $1.92 \times 10^{-4}$          | 6.86     | 15    | 107(13)                                      | 10.8(<0.1)                         | 0.9(0.1)                            | 116              | 8     |
| 7 <sub>0,7</sub> → 6 <sub>0,6</sub>                            | <i>para</i>  | 240266.872 <sup>F</sup> | 46.1           | $2.05 \times 10^{-4}$          | 7.00     | 15    | 24(6)                                        | 10.8(0.1)                          | 0.3(0.2)                            | 76               | 3     |
| 7 <sub>2,6</sub> → 6 <sub>2,5</sub>                            | <i>para</i>  | 240382.051 <sup>F</sup> | 98.8           | $1.88 \times 10^{-4}$          | 6.43     | 15    | } 122(14)                                    | 10.5(0.1)                          | 1.6(0.2)                            | 72               | 6     |
| 7 <sub>3,5</sub> → 6 <sub>3,4</sub>                            | <i>ortho</i> | 240393.037 <sup>F</sup> | 149.8          | $1.68 \times 10^{-4}$          | 5.71     | 15    |                                              | 62(11)                             | 10.7(0.1)                           | 1.5(0.2)         | 54    |
| 7 <sub>3,4</sub> → 6 <sub>3,3</sub>                            | <i>ortho</i> | 240393.762 <sup>F</sup> | 149.8          | $1.68 \times 10^{-4}$          | 5.71     | 15    |                                              |                                    |                                     |                  |       |
| 7 <sub>2,5</sub> → 6 <sub>2,4</sub>                            | <i>para</i>  | 240549.066 <sup>F</sup> | 98.8           | $1.89 \times 10^{-4}$          | 6.43     | 15    |                                              |                                    |                                     |                  |       |

**Table B.4.** continued.

| Transition<br>$(J_{K_a, K_c})_u \rightarrow (J_{K_a, K_c})_l$ | Sym.*        | Frequency<br>[MHz]      | $E_u/k$<br>[K] | $A_{ul}$<br>[s <sup>-1</sup> ] | $S_{ul}$ | $g_u$ | $\int T_{MB} dv$<br>[mK km s <sup>-1</sup> ] | $v_{LSR}$<br>[km s <sup>-1</sup> ] | $\Delta v$<br>[km s <sup>-1</sup> ] | $T_{MB}$<br>[mK] | S/N |
|---------------------------------------------------------------|--------------|-------------------------|----------------|--------------------------------|----------|-------|----------------------------------------------|------------------------------------|-------------------------------------|------------------|-----|
| $7_{1,6} \rightarrow 6_{1,5}$                                 | <i>ortho</i> | 244048.504 <sup>F</sup> | 45.2           | $2.10 \times 10^{-4}$          | 6.86     | 15    | 185(11)                                      | 10.9(<0.1)                         | 0.8(0.1)                            | 260              | 14  |
| $8_{1,8} \rightarrow 7_{1,7}$                                 | <i>ortho</i> | 270521.931 <sup>F</sup> | 56.8           | $2.90 \times 10^{-4}$          | 7.88     | 17    | 128(16)                                      | 10.8(0.1)                          | 0.9(0.2)                            | 139              | 6   |
| $8_{0,8} \rightarrow 7_{0,7}$                                 | <i>para</i>  | 274521.931 <sup>F</sup> | 59.3           | $3.08 \times 10^{-4}$          | 8.00     | 17    | 60(9)                                        | 11.1(0.1)                          | 0.7(0.1)                            | 77               | 5   |
| $8_{2,6} \rightarrow 7_{2,5}$                                 | <i>para</i>  | 274953.744 <sup>F</sup> | 112.0          | $2.90 \times 10^{-4}$          | 7.50     | 17    | 36(9)                                        | 11.0(0.1)                          | 0.9(0.2)                            | 39               | 3   |
| $8_{1,7} \rightarrow 7_{1,6}$                                 | <i>ortho</i> | 278887.661 <sup>F</sup> | 58.6           | $3.18 \times 10^{-4}$          | 7.87     | 17    | 195(13)                                      | 10.9(<0.1)                         | 0.7(0.1)                            | 245              | 14  |
| $9_{1,9} \rightarrow 8_{1,8}$                                 | <i>ortho</i> | 304307.709 <sup>F</sup> | 71.4           | $4.17 \times 10^{-4}$          | 8.89     | 19    | 75(8)                                        | 10.7(0.1)                          | 0.7(0.1)                            | 101              | 5   |
| $10_{1,10} \rightarrow 9_{1,9}$                               | <i>ortho</i> | 338083.195 <sup>F</sup> | 87.6           | $5.77 \times 10^{-4}$          | 9.90     | 21    | 108(30)                                      | 10.6(0.1)                          | 0.9(0.3)                            | 113              | 3   |

**Notes.** Frequencies,  $E_u/k$ ,  $A_{ul}$ ,  $S_{ul}$ , and  $g_u$  from CDMS catalogue.

**Table B.5.** Line parameters of HNCO.

| Transition<br>$(J_{K_a, K_c})_u \rightarrow (J_{K_a, K_c})_l$ | Frequency<br>[MHz]      | $E_u/k$<br>[K] | $A_{ul}$<br>[s <sup>-1</sup> ] | $S_{ul}$ | $g_u$ | $\int T_{MB} dv$<br>[mK km s <sup>-1</sup> ] | $v_{LSR}$<br>[km s <sup>-1</sup> ] | $\Delta v$<br>[km s <sup>-1</sup> ] | $T_{MB}$<br>[mK] | S/N |
|---------------------------------------------------------------|-------------------------|----------------|--------------------------------|----------|-------|----------------------------------------------|------------------------------------|-------------------------------------|------------------|-----|
| $4_{0,4} \rightarrow 3_{0,3}$                                 | 87925.237 <sup>F</sup>  | 10.5           | $9.03 \times 10^{-6}$          | 4.0      | 9     | 49(6)                                        | 10.8(0.1)                          | 1.7(0.2)                            | 27               | 8   |
| $5_{0,5} \rightarrow 4_{0,4}$                                 | 109905.749 <sup>F</sup> | 15.8           | $1.80 \times 10^{-5}$          | 5.0      | 11    | 110(9)                                       | 10.6(0.1)                          | 1.9(0.2)                            | 54               | 10  |
| $7_{0,7} \rightarrow 6_{0,6}$                                 | 153865.086 <sup>W</sup> | 29.5           | $5.08 \times 10^{-5}$          | 7.0      | 15    | 125(39)                                      | —                                  | —                                   | —                | 3   |
| $10_{0,10} \rightarrow 9_{0,9}$                               | 219798.274 <sup>F</sup> | 58.0           | $1.51 \times 10^{-4}$          | 10.0     | 21    | 154(16)                                      | 10.6(0.2)                          | 3.3(0.4)                            | 44               | 6   |
| $11_{0,11} \rightarrow 10_{0,10}$                             | 241774.032 <sup>F</sup> | 69.6           | $2.02 \times 10^{-4}$          | 11.0     | 23    | 118(21)                                      | 10.7(0.1)                          | 1.6(0.3)                            | 69               | 5   |
| $13_{0,13} \rightarrow 12_{0,12}$                             | 285721.951 <sup>F</sup> | 96.0           | $3.36 \times 10^{-4}$          | 13.0     | 27    | 129(26)                                      | 10.4(0.3)                          | 2.8(0.7)                            | 43               | 5   |

**Notes.** Frequencies,  $E_u/k$ ,  $A_{ul}$ ,  $S_{ul}$ , and  $g_u$  from CDMS catalogue.

**Table B.6.** Line parameters of CH<sub>2</sub>NH.

| Transition<br>$(J_{K_a, K_c})_u \rightarrow (J_{K_a, K_c})_l$ | Frequency<br>[MHz]      | $E_u/k$<br>[K] | $A_{ul}$<br>[s <sup>-1</sup> ] | $S_{ul}$ | $g_u$ | $\int T_{MB} dv$<br>[mK km s <sup>-1</sup> ] | $v_{LSR}$<br>[km s <sup>-1</sup> ] | $\Delta v$<br>[km s <sup>-1</sup> ] | $T_{MB}$<br>[mK] | S/N |
|---------------------------------------------------------------|-------------------------|----------------|--------------------------------|----------|-------|----------------------------------------------|------------------------------------|-------------------------------------|------------------|-----|
| $4_{0,4} \rightarrow 3_{1,3}$                                 | 105794.062 <sup>F</sup> | 30.6           | $1.62 \times 10^{-5}$          | 5.0      | 9     | 55(13)                                       | 11.3(0.5)                          | 4.2(1.3)                            | 12               | 3   |
| $1_{1,1} \rightarrow 0_{0,0}$                                 | 225554.609 <sup>F</sup> | 10.8           | $2.79 \times 10^{-4}$          | 3.0      | 3     | 120(26)                                      | 10.5(0.2)                          | 2.9(0.9)                            | 39               | 4   |
| $4_{1,4} \rightarrow 3_{1,3}$                                 | 245125.866 <sup>F</sup> | 37.3           | $3.85 \times 10^{-4}$          | 11.2     | 9     | 106(14)                                      | 11.1(0.1)                          | 2.3(0.4)                            | 43               | 4   |
| $6_{0,6} \rightarrow 5_{1,5}$                                 | 251421.265 <sup>F</sup> | 64.1           | $2.73 \times 10^{-4}$          | 9.2      | 13    | 72(13)                                       | 11.0(0.3)                          | 3.1(0.6)                            | 22               | 4   |
| $4_{0,4} \rightarrow 3_{0,3}$                                 | 254685.137 <sup>F</sup> | 30.6           | $4.60 \times 10^{-4}$          | 12.0     | 9     | 314(12)                                      | 10.8(0.1)                          | 2.0(0.1)                            | 147              | 14  |
| $4_{1,3} \rightarrow 3_{1,2}$                                 | 266270.024 <sup>F</sup> | 39.8           | $4.93 \times 10^{-4}$          | 11.2     | 9     | 117(12)                                      | 10.9(0.1)                          | 2.0(0.2)                            | 54               | 5   |

**Notes.** Frequencies,  $E_u/k$ ,  $A_{ul}$ ,  $S_{ul}$ , and  $g_u$  from CDMS catalogue.

**Table B.7.** Line parameters of H<sub>2</sub>CCO.

| Transition<br>( $J_{K_a, K_c})_u \rightarrow (J_{K_a, K_c})_l$ | Sym.*        | Frequency<br>[MHz]      | $E_u/k$<br>[K] | $A_{ul}$<br>[s <sup>-1</sup> ] | $S_{ul}$ | $g_u$ | $\int T_{MB} dv$<br>[mK km s <sup>-1</sup> ] | $v_{LSR}$<br>[km s <sup>-1</sup> ] | $\Delta v$<br>[km s <sup>-1</sup> ] | $T_{MB}$<br>[mK] | $S/N$ |
|----------------------------------------------------------------|--------------|-------------------------|----------------|--------------------------------|----------|-------|----------------------------------------------|------------------------------------|-------------------------------------|------------------|-------|
| 4 <sub>2,3</sub> → 3 <sub>2,2</sub>                            | <i>para</i>  | 80820.400 <sup>F</sup>  | 61.9           | 4.14 × 10 <sup>-6</sup>        | 3.0      | 9     | 13(9)                                        | 10.9(0.7)                          | 1.6(0.7)                            | 8                | 2     |
| 4 <sub>1,3</sub> → 3 <sub>1,2</sub>                            | <i>ortho</i> | 81586.239 <sup>F</sup>  | 8.8            | 5.33 × 10 <sup>-6</sup>        | 3.8      | 9     | 44(8)                                        | 11.0(0.3)                          | 2.5(0.6)                            | 13               | 4     |
| 5 <sub>1,5</sub> → 4 <sub>1,4</sub>                            | <i>ortho</i> | 100094.511 <sup>F</sup> | 13.5           | 1.03 × 10 <sup>-5</sup>        | 4.8      | 11    | 61(6)                                        | 10.4(0.2)                          | 1.9(0.5)                            | 30               | 3     |
| 5 <sub>3,3</sub> → 4 <sub>3,2</sub>                            | <i>ortho</i> | 101002.349 <sup>F</sup> | 117.9          | 7.06 × 10 <sup>-6</sup>        | 3.2      | 11    | } 25(8)                                      | 10.3(0.2)                          | 1.0(0.3)                            | 25               | 3     |
| 5 <sub>3,2</sub> → 4 <sub>3,1</sub>                            | <i>ortho</i> | 101002.354 <sup>F</sup> | 117.9          | 7.06 × 10 <sup>-6</sup>        | 3.2      | 11    |                                              |                                    |                                     |                  |       |
| 5 <sub>2,4</sub> → 4 <sub>2,3</sub>                            | <i>para</i>  | 101024.430 <sup>F</sup> | 66.7           | 9.27 × 10 <sup>-6</sup>        | 4.2      | 11    | 24(6)                                        | 10.2(0.2)                          | 1.7(0.8)                            | 15               | 2     |
| 5 <sub>1,4</sub> → 4 <sub>1,3</sub>                            | <i>ortho</i> | 101981.442 <sup>F</sup> | 13.7           | 1.09 × 10 <sup>-5</sup>        | 4.8      | 11    | 58(6)                                        | 10.9(0.1)                          | 2.3(0.3)                            | 24               | 7     |
| 7 <sub>1,7</sub> → 6 <sub>1,6</sub>                            | <i>ortho</i> | 140127.471 <sup>W</sup> | 25.9           | 2.96 × 10 <sup>-5</sup>        | 6.9      | 15    | 107(43)                                      | —                                  | —                                   | —                | 5     |
| 7 <sub>3,5</sub> → 6 <sub>3,4</sub>                            | <i>ortho</i> | 141402.460 <sup>W</sup> | 130.5          | 2.54 × 10 <sup>-5</sup>        | 5.7      | 15    | } 71(32)                                     | —                                  | —                                   | —                | 4     |
| 7 <sub>3,4</sub> → 6 <sub>3,3</sub>                            | <i>ortho</i> | 141402.491 <sup>W</sup> | 130.5          | 2.54 × 10 <sup>-5</sup>        | 5.7      | 15    |                                              |                                    |                                     |                  |       |
| 8 <sub>1,7</sub> → 7 <sub>1,6</sub>                            | <i>ortho</i> | 163160.893 <sup>W</sup> | 34.3           | 4.74 × 10 <sup>-5</sup>        | 7.9      | 17    | 114(22)                                      | —                                  | —                                   | —                | 5     |
| 11 <sub>1,11</sub> → 10 <sub>1,10</sub>                        | <i>ortho</i> | 220177.558 <sup>F</sup> | 62.4           | 1.19 × 10 <sup>-4</sup>        | 10.9     | 23    | 128(13)                                      | 10.8(0.1)                          | 2.6(0.3)                            | 47               | 5     |
| 11 <sub>3,9</sub> → 10 <sub>3,8</sub>                          | <i>ortho</i> | 222199.879 <sup>F</sup> | 167.4          | 1.14 × 10 <sup>-4</sup>        | 10.2     | 23    | } 120(13)                                    | 10.5(0.1)                          | 1.9(0.5)                            | 59               | 8     |
| 11 <sub>3,8</sub> → 10 <sub>3,7</sub>                          | <i>ortho</i> | 222200.199 <sup>F</sup> | 167.4          | 1.14 × 10 <sup>-4</sup>        | 10.2     | 23    |                                              |                                    |                                     |                  |       |
| 11 <sub>2,10</sub> → 10 <sub>2,9</sub>                         | <i>para</i>  | 222228.629 <sup>F</sup> | 116.2          | 1.20 × 10 <sup>-4</sup>        | 10.6     | 23    | 54(15)                                       | 10.7(0.1)                          | 2.0(0.8)                            | 25               | 4     |
| 11 <sub>1,10</sub> → 10 <sub>1,9</sub>                         | <i>ortho</i> | 224327.246 <sup>F</sup> | 63.6           | 1.26 × 10 <sup>-4</sup>        | 10.9     | 23    | 125(11)                                      | 10.8(0.1)                          | 2.5(0.2)                            | 47               | 7     |
| 12 <sub>1,12</sub> → 11 <sub>1,11</sub>                        | <i>ortho</i> | 240185.798 <sup>F</sup> | 74.0           | 1.56 × 10 <sup>-4</sup>        | 11.9     | 25    | 123(19)                                      | 10.9(0.2)                          | 2.6(0.6)                            | 45               | 5     |
| 12 <sub>0,12</sub> → 11 <sub>0,11</sub>                        | <i>para</i>  | 242375.721 <sup>F</sup> | 75.6           | 1.61 × 10 <sup>-4</sup>        | 12.0     | 25    | 38(11)                                       | 10.5(0.1)                          | 0.8(0.2)                            | 46               | 2     |
| 12 <sub>1,11</sub> → 11 <sub>1,10</sub>                        | <i>ortho</i> | 244712.254 <sup>F</sup> | 75.4           | 1.64 × 10 <sup>-4</sup>        | 11.9     | 25    | 123(13)                                      | 10.8(0.1)                          | 1.7(0.1)                            | 69               | 5     |
| 13 <sub>1,13</sub> → 12 <sub>1,12</sub>                        | <i>ortho</i> | 260191.993 <sup>W</sup> | 86.5           | 1.99 × 10 <sup>-4</sup>        | 12.9     | 27    | 100(19)                                      | —                                  | —                                   | —                | 7     |
| 13 <sub>0,13</sub> → 12 <sub>0,12</sub>                        | <i>para</i>  | 262548.202 <sup>F</sup> | 88.2           | 2.05 × 10 <sup>-4</sup>        | 13.0     | 27    | 35(9)                                        | 10.8(0.1)                          | 1.2(0.2)                            | 28               | 3     |
| 13 <sub>3,11</sub> → 12 <sub>3,10</sub>                        | <i>ortho</i> | 262596.638 <sup>F</sup> | 191.6          | 1.94 × 10 <sup>-4</sup>        | 12.3     | 27    | } 108(17)                                    | 10.7(0.1)                          | 2.1(0.3)                            | 46               | 5     |
| 13 <sub>3,10</sub> → 12 <sub>3,9</sub>                         | <i>ortho</i> | 262597.384 <sup>F</sup> | 191.6          | 1.94 × 10 <sup>-4</sup>        | 12.3     | 27    |                                              |                                    |                                     |                  |       |
| 13 <sub>2,12</sub> → 12 <sub>2,11</sub>                        | <i>para</i>  | 262618.994 <sup>F</sup> | 140.4          | 2.00 × 10 <sup>-4</sup>        | 12.7     | 27    | 43(9)                                        | 10.7(0.2)                          | 1.5(0.2)                            | 27               | 3     |
| 13 <sub>2,11</sub> → 12 <sub>2,10</sub>                        | <i>para</i>  | 262760.857 <sup>F</sup> | 140.5          | 2.01 × 10 <sup>-4</sup>        | 12.7     | 27    | 38(15)                                       | 10.3(0.3)                          | 1.8(0.8)                            | 20               | 3     |
| 13 <sub>1,12</sub> → 12 <sub>1,11</sub>                        | <i>ortho</i> | 265095.061 <sup>F</sup> | 88.1           | 2.10 × 10 <sup>-4</sup>        | 13.0     | 27    | 99(10)                                       | 10.7(0.1)                          | 1.5(0.1)                            | 63               | 6     |
| 14 <sub>1,14</sub> → 13 <sub>1,13</sub>                        | <i>ortho</i> | 280195.979 <sup>F</sup> | 99.9           | 2.49 × 10 <sup>-4</sup>        | 13.9     | 29    | 128(13)                                      | 10.6(0.1)                          | 2.0(0.2)                            | 61               | 6     |
| 14 <sub>0,14</sub> → 13 <sub>0,13</sub>                        | <i>para</i>  | 282714.584 <sup>F</sup> | 101.8          | 2.57 × 10 <sup>-4</sup>        | 14.0     | 29    | 33(15)                                       | 10.8(0.3)                          | 1.0(0.3)                            | 31               | 3     |
| 14 <sub>3,12</sub> → 13 <sub>3,11</sub>                        | <i>ortho</i> | 282794.399 <sup>F</sup> | 205.2          | 2.45 × 10 <sup>-4</sup>        | 13.4     | 29    | } 131(15)                                    | 10.5(0.1)                          | 2.0(0.2)                            | 62               | 6     |
| 14 <sub>3,11</sub> → 13 <sub>3,10</sub>                        | <i>ortho</i> | 282795.485 <sup>F</sup> | 205.2          | 2.45 × 10 <sup>-4</sup>        | 13.4     | 29    |                                              |                                    |                                     |                  |       |
| 14 <sub>2,13</sub> → 13 <sub>2,12</sub>                        | <i>para</i>  | 282811.466 <sup>F</sup> | 154.0          | 2.52 × 10 <sup>-4</sup>        | 13.7     | 29    | 39(13)                                       | 10.5(0.1)                          | 0.9(0.3)                            | 45               | 4     |
| 14 <sub>2,12</sub> → 13 <sub>2,11</sub>                        | <i>para</i>  | 282988.739 <sup>F</sup> | 154.0          | 2.52 × 10 <sup>-4</sup>        | 13.7     | 29    | 34(7)                                        | 10.7(0.1)                          | 1.0(0.2)                            | 34               | 4     |
| 14 <sub>1,13</sub> → 13 <sub>1,12</sub>                        | <i>ortho</i> | 285475.477 <sup>F</sup> | 101.8          | 2.63 × 10 <sup>-4</sup>        | 13.9     | 29    | 107(18)                                      | 10.5(0.2)                          | 1.8(0.3)                            | 54               | 4     |
| 15 <sub>1,15</sub> → 14 <sub>1,14</sub>                        | <i>ortho</i> | 300197.596 <sup>F</sup> | 114.3          | 3.07 × 10 <sup>-4</sup>        | 14.9     | 31    | 89(39)                                       | 10.7(0.4)                          | 1.9(0.5)                            | 44               | 2     |
| 15 <sub>3,13</sub> → 14 <sub>3,12</sub>                        | <i>ortho</i> | 302991.695 <sup>F</sup> | 219.7          | 3.04 × 10 <sup>-4</sup>        | 14.4     | 31    | } 116(28)                                    | 11.0(0.3)                          | 2.2(0.4)                            | 49               | 2     |
| 15 <sub>3,12</sub> → 14 <sub>3,11</sub>                        | <i>ortho</i> | 302993.234 <sup>F</sup> | 219.7          | 3.04 × 10 <sup>-4</sup>        | 14.4     | 31    |                                              |                                    |                                     |                  |       |

**Notes.** Frequencies,  $E_u/k$ ,  $A_{ul}$ ,  $S_{ul}$ , and  $g_u$  from MADEX code, that fit to all rotational lines reported in the CDMS database.

**Table B.8.** Line parameters of HC<sub>3</sub>N.

| Transition            | Frequency               | $E_u/k$ | $A_{ul}$              | $S_{ul}$ | $g_u$ | $\int T_{MB} dv$         | $v_{LSR}$             | $\Delta v$            | $T_{MB}$ | $S/N$ |
|-----------------------|-------------------------|---------|-----------------------|----------|-------|--------------------------|-----------------------|-----------------------|----------|-------|
| $J_u \rightarrow J_l$ | [MHz]                   | [K]     | [s <sup>-1</sup> ]    |          |       | [mK km s <sup>-1</sup> ] | [km s <sup>-1</sup> ] | [km s <sup>-1</sup> ] | [mK]     |       |
| 9 → 8                 | 81881.462 <sup>F</sup>  | 19.6    | $4.22 \times 10^{-5}$ | 9.0      | 19    | 50(19)                   | 10.8(0.2)             | 2.1(0.6)              | 23(s)    | 6     |
| 10 → 9                | 90978.989 <sup>F</sup>  | 24.0    | $5.81 \times 10^{-5}$ | 10.0     | 21    | 86(11)                   | 10.5(0.2)             | 2.9(0.4)              | 28       | 6     |
| 11 → 10               | 100076.385 <sup>F</sup> | 28.8    | $7.77 \times 10^{-5}$ | 11.0     | 23    | 80(14)                   | 10.5(0.2)             | 1.8(0.3)              | 42       | 6     |
| 12 → 11               | 109173.637 <sup>F</sup> | 34.1    | $1.01 \times 10^{-4}$ | 12.0     | 25    | 76(8)                    | 10.7(0.1)             | 2.0(0.2)              | 37       | 10    |
| 15 → 14               | 136464.402 <sup>W</sup> | 52.4    | $1.99 \times 10^{-4}$ | 15.0     | 31    | 164(59)                  | —                     | —                     | —        | 3     |
| 16 → 15               | 145560.949 <sup>W</sup> | 59.4    | $2.42 \times 10^{-4}$ | 16.0     | 33    | 95(59)                   | —                     | —                     | —        | 4     |
| 17 → 16               | 154657.288 <sup>W</sup> | 66.8    | $2.91 \times 10^{-4}$ | 17.0     | 35    | 162(36)                  | —                     | —                     | —        | 5     |
| 18 → 17               | 163753.404 <sup>W</sup> | 74.7    | $3.46 \times 10^{-4}$ | 18.0     | 37    | 162(20)                  | —                     | —                     | —        | 8     |
| 19 → 18               | 172849.285 <sup>W</sup> | 83.0    | $4.08 \times 10^{-4}$ | 19.0     | 39    | 169(17)                  | —                     | —                     | —        | 2     |
| 23 → 22               | 209230.199 <sup>F</sup> | 120.5   | $7.27 \times 10^{-4}$ | 23.0     | 47    | 54(16)                   | 10.8(0.2)             | 1.7(0.6)              | 30       | 5     |
| 24 → 23               | 218324.709 <sup>F</sup> | 131.0   | $8.26 \times 10^{-4}$ | 24.0     | 49    | 16(4)                    | 10.9(0.1)             | 0.6(0.2)              | 24       | 4     |

**Notes.** Frequencies,  $E_u/k$ ,  $A_{ul}$ ,  $S_{ul}$ , and  $g_u$  from MADEX code, that fit to all rotational lines reported by de Zafra (1971); Mbosei et al. (2000); Creswell et al. (1977); Chen et al. (1991); Yamada et al. (1995); Thorwirth et al. (2000).

**Table B.9.** Line parameters of CH<sub>3</sub>CN.

| Transition                      | Sym.* | Frequency               | $E_u/k$ | $A_{ul}$              | $S_{ul}$ | $g_u$ | $\int T_{MB} dv$         | $v_{LSR}$             | $\Delta v$            | $T_{MB}$ | $S/N$ |
|---------------------------------|-------|-------------------------|---------|-----------------------|----------|-------|--------------------------|-----------------------|-----------------------|----------|-------|
| $(J_K)_u \rightarrow (J_K)_l$   |       | [MHz]                   | [K]     | [s <sup>-1</sup> ]    |          |       | [mK km s <sup>-1</sup> ] | [km s <sup>-1</sup> ] | [km s <sup>-1</sup> ] | [mK]     |       |
| 5 <sub>4</sub> → 4 <sub>4</sub> | E     | 91958.726 <sup>F</sup>  | 119.5   | $2.28 \times 10^{-5}$ | 1.8      | 11    | 26(13)                   | 12.5(0.5)             | 2.0(1.0)              | 13       | 3     |
| 5 <sub>3</sub> → 4 <sub>3</sub> | A     | 91971.130 <sup>F</sup>  | 77.5    | $4.06 \times 10^{-5}$ | 6.4      | 22    | 103(9)                   | 10.2(0.2)             | 4.0(0.4)              | 24       | 6     |
| 5 <sub>2</sub> → 4 <sub>2</sub> | E     | 91979.993 <sup>F</sup>  | 33.8    | $5.33 \times 10^{-5}$ | 4.2      | 11    | 84(16)                   | 10.6(0.3)             | 3.0(0.7)              | 26       | 6     |
| 5 <sub>1</sub> → 4 <sub>1</sub> | E     | 91985.313 <sup>F</sup>  | 12.4    | $6.09 \times 10^{-5}$ | 4.8      | 11    | 114(12)                  | 10.5(0.1)             | 2.6(0.4)              | 40       | 9     |
| 5 <sub>0</sub> → 4 <sub>0</sub> | A     | 91987.087 <sup>F</sup>  | 13.2    | $6.35 \times 10^{-5}$ | 5.0      | 11    | 138(13)                  | 10.9(0.1)             | 2.8(0.4)              | 46       | 11    |
| 6 <sub>3</sub> → 5 <sub>3</sub> | A     | 110364.353 <sup>F</sup> | 82.8    | $8.35 \times 10^{-5}$ | 9.0      | 26    | 151(11)                  | 10.8(0.1)             | 2.7(0.2)              | 53       | 8     |
| 6 <sub>2</sub> → 5 <sub>2</sub> | E     | 110374.988 <sup>F</sup> | 39.1    | $9.89 \times 10^{-5}$ | 5.3      | 13    | 87(10)                   | 10.7(0.1)             | 2.0(0.3)              | 40       | 7     |
| 6 <sub>1</sub> → 5 <sub>1</sub> | E     | 110381.371 <sup>F</sup> | 17.7    | $1.08 \times 10^{-4}$ | 5.8      | 13    | 144(10)                  | 10.8(0.1)             | 2.1(0.2)              | 65       | 10    |
| 6 <sub>0</sub> → 5 <sub>0</sub> | A     | 110383.499 <sup>F</sup> | 18.5    | $1.11 \times 10^{-4}$ | 6.0      | 13    | 137(10)                  | 10.8(0.1)             | 2.1(0.2)              | 62       | 11    |
| 7 <sub>4</sub> → 6 <sub>4</sub> | E     | 128739.669 <sup>W</sup> | 131.0   | $1.20 \times 10^{-4}$ | 4.7      | 15    | 75(49)                   | —                     | —                     | —        | 2     |
| 7 <sub>3</sub> → 6 <sub>3</sub> | A     | 128757.029 <sup>W</sup> | 89.0    | $1.46 \times 10^{-4}$ | 11.4     | 30    | 181(59)                  | —                     | —                     | —        | 3     |
| 7 <sub>2</sub> → 6 <sub>2</sub> | E     | 128769.435 <sup>W</sup> | 45.3    | $1.64 \times 10^{-4}$ | 6.4      | 15    | 112(62)                  | —                     | —                     | —        | 4     |
| 7 <sub>1</sub> → 6 <sub>1</sub> | E     | 128776.880 <sup>W</sup> | 23.8    | $1.75 \times 10^{-4}$ | 6.8      | 15    | } 425(59)                | —                     | —                     | —        | 6     |
| 7 <sub>0</sub> → 6 <sub>0</sub> | A     | 128779.363 <sup>W</sup> | 24.7    | $1.79 \times 10^{-4}$ | 7.0      | 15    |                          |                       |                       |          |       |
| 8 <sub>3</sub> → 7 <sub>3</sub> | A     | 147149.068 <sup>W</sup> | 96.1    | $2.31 \times 10^{-4}$ | 13.8     | 34    | 149(31)                  | —                     | —                     | —        | 4     |
| 8 <sub>2</sub> → 7 <sub>2</sub> | E     | 147163.243 <sup>W</sup> | 52.3    | $2.52 \times 10^{-4}$ | 7.5      | 17    | 98(33)                   | —                     | —                     | —        | 2     |
| 8 <sub>1</sub> → 7 <sub>1</sub> | E     | 147171.751 <sup>W</sup> | 30.9    | $2.65 \times 10^{-4}$ | 7.9      | 17    | } 385(41)                | —                     | —                     | —        | 8     |
| 8 <sub>0</sub> → 7 <sub>0</sub> | A     | 147174.587 <sup>W</sup> | 31.8    | $2.69 \times 10^{-4}$ | 8.0      | 17    |                          |                       |                       |          |       |
| 9 <sub>4</sub> → 8 <sub>4</sub> | E     | 165518.064 <sup>W</sup> | 146.0   | $3.09 \times 10^{-4}$ | 7.2      | 19    | 85(23)                   | —                     | —                     | —        | 3     |
| 9 <sub>3</sub> → 8 <sub>3</sub> | A     | 165540.376 <sup>W</sup> | 104.0   | $3.43 \times 10^{-4}$ | 16.0     | 38    | 177(20)                  | —                     | —                     | —        | 9     |

Table B.9. continued

| Transition<br>( $J_K$ ) <sub>u</sub> → ( $J_K$ ) <sub>l</sub> | Sym.* | Frequency<br>[MHz]      | $E_u/k$<br>[K] | $A_{ul}$<br>[s <sup>-1</sup> ] | $S_{ul}$ | $g_u$ | $\int T_{MB} dv$<br>[mK km s <sup>-1</sup> ] | $v_{LSR}$<br>[km s <sup>-1</sup> ] | $\Delta v$<br>[km s <sup>-1</sup> ] | $T_{MB}$<br>[mK] | $S/N$ |
|---------------------------------------------------------------|-------|-------------------------|----------------|--------------------------------|----------|-------|----------------------------------------------|------------------------------------|-------------------------------------|------------------|-------|
| 9 <sub>2</sub> → 8 <sub>2</sub>                               | E     | 165556.321 <sup>W</sup> | 60.3           | $3.66 \times 10^{-4}$          | 8.6      | 19    | 108(19)                                      | —                                  | —                                   | —                | 7     |
| 9 <sub>1</sub> → 8 <sub>1</sub>                               | E     | 165565.890 <sup>W</sup> | 38.8           | $3.81 \times 10^{-4}$          | 8.9      | 19    | } 419(24)                                    | —                                  | —                                   | —                | 14    |
| 9 <sub>0</sub> → 8 <sub>0</sub>                               | A     | 165569.080 <sup>W</sup> | 39.7           | $3.86 \times 10^{-4}$          | 9.0      | 19    |                                              | —                                  | —                                   | —                | —     |
| 11 <sub>3</sub> → 10 <sub>3</sub>                             | A     | 202320.442 <sup>F</sup> | 122.6          | $6.58 \times 10^{-4}$          | 20.3     | 46    | 140(11)                                      | 10.7(0.1)                          | 2.0(0.2)                            | 64               | 8     |
| 11 <sub>2</sub> → 10 <sub>2</sub>                             | E     | 202339.920 <sup>F</sup> | 78.8           | $6.87 \times 10^{-4}$          | 10.6     | 23    | 78(9)                                        | 10.7(0.1)                          | 1.5(0.2)                            | 49               | 6     |
| 11 <sub>1</sub> → 10 <sub>1</sub>                             | E     | 202351.610 <sup>F</sup> | 57.4           | $7.05 \times 10^{-4}$          | 10.9     | 23    | 103(13)                                      | 10.7(0.2)                          | 2.9(0.4)                            | 33               | 5     |
| 11 <sub>0</sub> → 10 <sub>0</sub>                             | A     | 202355.507 <sup>F</sup> | 58.3           | $7.11 \times 10^{-4}$          | 11.0     | 23    | 135(11)                                      | 10.7(0.1)                          | 2.3(0.2)                            | 55               | 7     |
| 12 <sub>4</sub> → 11 <sub>4</sub>                             | E     | 220679.287 <sup>F</sup> | 175.1          | $8.22 \times 10^{-4}$          | 10.7     | 25    | 44(12)                                       | 10.9(0.3)                          | 1.8(0.5)                            | 23               | 4     |
| 12 <sub>3</sub> → 11 <sub>3</sub>                             | A     | 220709.016 <sup>F</sup> | 133.2          | $8.68 \times 10^{-4}$          | 22.5     | 50    | 100(15)                                      | 10.7(0.1)                          | 1.8(0.4)                            | 52               | 8     |
| 12 <sub>2</sub> → 11 <sub>2</sub>                             | E     | 220730.259 <sup>F</sup> | 89.4           | $9.00 \times 10^{-4}$          | 11.7     | 25    | 61(15)                                       | 10.6(0.3)                          | 1.7(0.0)                            | 34               | 6     |
| 12 <sub>1</sub> → 11 <sub>1</sub>                             | E     | 220743.009 <sup>F</sup> | 68.0           | $9.20 \times 10^{-4}$          | 11.9     | 25    | 122(15)                                      | 10.4(0.1)                          | 1.7(0.2)                            | 72               | 11    |
| 12 <sub>0</sub> → 11 <sub>0</sub>                             | A     | 220747.259 <sup>F</sup> | 68.9           | $9.26 \times 10^{-4}$          | 12.0     | 25    | 69(15)                                       | 10.9(0.2)                          | 1.7(0.3)                            | 38               | 6     |
| 13 <sub>3</sub> → 12 <sub>3</sub>                             | A     | 239096.495 <sup>F</sup> | 144.6          | $1.12 \times 10^{-3}$          | 24.6     | 54    | 94(16)                                       | 10.8(0.1)                          | 1.9(0.5)                            | 46               | 7     |
| 13 <sub>2</sub> → 12 <sub>2</sub>                             | E     | 239119.503 <sup>F</sup> | 100.9          | $1.15 \times 10^{-3}$          | 12.7     | 27    | 20(11)                                       | 10.6(0.3)                          | 1.0(0.8)                            | 19               | 3     |
| 13 <sub>0</sub> → 12 <sub>0</sub>                             | A     | 239137.914 <sup>F</sup> | 80.3           | $1.18 \times 10^{-3}$          | 13.0     | 27    | 52(9)                                        | 10.5(0.2)                          | 1.3(0.4)                            | 23               | 3     |
| 14 <sub>4</sub> → 13 <sub>4</sub>                             | E     | 257448.128 <sup>F</sup> | 199.0          | $1.36 \times 10^{-3}$          | 12.9     | 29    | 29(10)                                       | 10.6(0.3)                          | 1.5(0.6)                            | 19               | 3     |
| 14 <sub>3</sub> → 13 <sub>3</sub>                             | A     | 257482.790 <sup>F</sup> | 157.0          | $1.41 \times 10^{-3}$          | 26.7     | 58    | 57(17)                                       | 10.6(0.2)                          | 1.5(0.3)                            | 36               | 5     |
| 14 <sub>2</sub> → 13 <sub>2</sub>                             | E     | 257507.560 <sup>F</sup> | 113.3          | $1.45 \times 10^{-3}$          | 13.7     | 29    | 55(10)                                       | 10.7(0.1)                          | 1.3(0.3)                            | 40               | 6     |
| 14 <sub>1</sub> → 13 <sub>1</sub>                             | E     | 257522.425 <sup>F</sup> | 91.8           | $1.47 \times 10^{-3}$          | 13.9     | 29    | 53(11)                                       | 10.8(0.3)                          | 2.0(0.5)                            | 24               | 4     |
| 14 <sub>0</sub> → 13 <sub>0</sub>                             | A     | 257527.381 <sup>F</sup> | 92.7           | $1.48 \times 10^{-3}$          | 14.0     | 29    | 42(8)                                        | 10.9(0.1)                          | 1.0(0.2)                            | 38               | 5     |
| 15 <sub>3</sub> → 14 <sub>3</sub>                             | A     | 275867.809 <sup>F</sup> | 170.2          | $1.75 \times 10^{-3}$          | 28.8     | 62    | 61(14)                                       | 10.5(0.2)                          | 1.5(0.4)                            | 38               | 4     |
| 15 <sub>2</sub> → 14 <sub>2</sub>                             | E     | 275894.339 <sup>F</sup> | 126.5          | $1.79 \times 10^{-3}$          | 14.7     | 31    | 31(9)                                        | 10.3(0.1)                          | 0.7(0.3)                            | 40               | 2     |
| 15 <sub>1</sub> → 14 <sub>1</sub>                             | E     | 275910.261 <sup>F</sup> | 105.1          | $1.81 \times 10^{-3}$          | 14.9     | 31    | 30(12)                                       | 10.7(0.2)                          | 0.7(0.2)                            | 40               | 2     |
| 16 <sub>3</sub> → 15 <sub>3</sub>                             | A     | 294251.460 <sup>F</sup> | 184.4          | $2.14 \times 10^{-3}$          | 30.9     | 66    | 55(13)                                       | 10.1(0.2)                          | 1.2(0.2)                            | 43               | 4     |
| 16 <sub>2</sub> → 15 <sub>2</sub>                             | E     | 294279.748 <sup>F</sup> | 140.6          | $2.18 \times 10^{-3}$          | 15.7     | 33    | 33(15)                                       | 10.4(0.2)                          | 0.9(0.3)                            | 34               | 4     |
| 16 <sub>1</sub> → 15 <sub>1</sub>                             | E     | 294296.726 <sup>F</sup> | 119.2          | $2.21 \times 10^{-3}$          | 15.9     | 33    | 34(9)                                        | 10.2(0.1)                          | 1.0(0.2)                            | 32               | 4     |
| 16 <sub>0</sub> → 15 <sub>0</sub>                             | A     | 294302.386 <sup>F</sup> | 120.1          | $2.22 \times 10^{-3}$          | 16.0     | 33    | 27(9)                                        | 10.9(0.2)                          | 0.8(0.2)                            | 32               | 2     |

**Notes.** Frequencies,  $E_u/k$ ,  $A_{ul}$ ,  $S_{ul}$ , and  $g_u$  from MADEX code, that fit to all rotational lines reported by Kukolich et al. (1973); Boucher et al. (1977); Kukolich (1982); Pavone et al. (1990); Cazzoli & Puzzarini (2006); Šimečková et al. (2004); Müller et al. (2009).

**Table B.10.** Line parameters of CH<sub>3</sub>OH.

| Transition<br>( $J_K)_u \rightarrow (J_K)_l$ | Sym.* | Frequency<br>[MHz]      | $E_u/k$<br>[K] | $A_{ul}$<br>[s <sup>-1</sup> ] | $S_{ul}$ | $g_u$ | $\int T_{MB} dv$<br>[mK km s <sup>-1</sup> ] | $v_{LSR}$<br>[km s <sup>-1</sup> ] | $\Delta v$<br>[km s <sup>-1</sup> ] | $T_{MB}$<br>[mK] | $S/N$ |
|----------------------------------------------|-------|-------------------------|----------------|--------------------------------|----------|-------|----------------------------------------------|------------------------------------|-------------------------------------|------------------|-------|
| 5 <sub>-1</sub> → 4 <sub>0</sub>             | E     | 84521.172 <sup>F</sup>  | 32.5           | 1.97 × 10 <sup>-6</sup>        | 1.5      | 11    | 149(8)                                       | 10.6(0.1)                          | 1.6(0.1)                            | 86               | 18    |
| 8 <sub>0</sub> → 7 <sub>1</sub>              | A     | 95169.391 <sup>F</sup>  | 83.5           | 2.13 × 10 <sup>-6</sup>        | 1.8      | 17    | 59(6)                                        | 10.4(0.1)                          | 1.5(0.1)                            | 54               | 14    |
| 2 <sub>1</sub> → 1 <sub>1</sub>              | A     | 95914.310 <sup>F</sup>  | 21.4           | 2.49 × 10 <sup>-6</sup>        | 1.5      | 5     | 28(12)                                       | 10.8(0.3)                          | 1.7(0.7)                            | 15               | 2     |
| 2 <sub>-1</sub> → 1 <sub>-1</sub>            | E     | 96739.358 <sup>F</sup>  | 4.6            | 2.56 × 10 <sup>-6</sup>        | 1.5      | 5     | 107(9)                                       | 10.7(0.1)                          | 1.5(0.1)                            | 67               | 9     |
| 2 <sub>0</sub> → 1 <sub>0</sub>              | A     | 96741.371 <sup>F</sup>  | 7.0            | 3.41 × 10 <sup>-6</sup>        | 2.0      | 5     | 206(9)                                       | 10.8(0.1)                          | 1.7(0.2)                            | 114              | 16    |
| 2 <sub>0</sub> → 1 <sub>0</sub>              | E     | 96744.545 <sup>F</sup>  | 12.2           | 3.41 × 10 <sup>-6</sup>        | 2.0      | 5     | 95(12)                                       | 10.7(0.1)                          | 1.9(0.3)                            | 44               | 6     |
| 2 <sub>1</sub> → 1 <sub>1</sub>              | E     | 96755.501 <sup>F</sup>  | 20.1           | 2.62 × 10 <sup>-6</sup>        | 1.5      | 5     | 66(13)                                       | 10.8(0.2)                          | 2.0(0.5)                            | 27               | 4     |
| 2 <sub>-1</sub> → 1 <sub>-1</sub>            | A     | 97582.798 <sup>F</sup>  | 21.6           | 2.63 × 10 <sup>-6</sup>        | 1.5      | 5     | 32(12)                                       | 10.5(0.2)                          | 1.7(0.6)                            | 18               | 4     |
| 3 <sub>1</sub> → 4 <sub>0</sub>              | A     | 107013.831 <sup>F</sup> | 28.3           | 3.07 × 10 <sup>-6</sup>        | 0.7      | 7     | 30(12)                                       | 9.7(0.4)                           | 2.2(0.2)                            | 13               | 3     |
| 0 <sub>0</sub> → 1 <sub>-1</sub>             | E     | 108893.945 <sup>F</sup> | 5.2            | 1.47 × 10 <sup>-5</sup>        | 0.5      | 1     | 45(6)                                        | 10.7(0.1)                          | 1.6(0.2)                            | 26               | 7     |
| 6 <sub>-1</sub> → 5 <sub>0</sub>             | E     | 132890.759 <sup>W</sup> | 46.4           | 7.75 × 10 <sup>-6</sup>        | 1.8      | 13    | 191(31)                                      | —                                  | —                                   | —                | 5     |
| 3 <sub>1</sub> → 2 <sub>1</sub>              | A     | 143865.795 <sup>W</sup> | 28.3           | 1.07 × 10 <sup>-5</sup>        | 2.7      | 7     | 74(28)                                       | —                                  | —                                   | —                | 3     |
| 3 <sub>-1</sub> → 2 <sub>-1</sub>            | E     | 145097.435 <sup>W</sup> | 11.6           | 1.10 × 10 <sup>-5</sup>        | 2.7      | 7     | 269(28)                                      | —                                  | —                                   | —                | 10    |
| 3 <sub>0</sub> → 2 <sub>0</sub>              | A     | 145103.185 <sup>W</sup> | 13.9           | 1.23 × 10 <sup>-5</sup>        | 3.0      | 7     | 384(83)                                      | —                                  | —                                   | —                | 12    |
| 3 <sub>-2</sub> → 2 <sub>-2</sub>            | A     | 145124.332 <sup>W</sup> | 51.6           | 6.89 × 10 <sup>-6</sup>        | 1.7      | 7     |                                              |                                    |                                     |                  |       |
| 3 <sub>2</sub> → 2 <sub>2</sub>              | E     | 145126.191 <sup>W</sup> | 28.3           | 6.77 × 10 <sup>-6</sup>        | 1.7      | 7     | } 103(23)                                    | —                                  | —                                   | —                | 4     |
| 3 <sub>-2</sub> → 2 <sub>-2</sub>            | E     | 145126.386 <sup>W</sup> | 31.9           | 6.86 × 10 <sup>-6</sup>        | 1.7      | 7     |                                              |                                    |                                     |                  |       |
| 3 <sub>1</sub> → 2 <sub>1</sub>              | E     | 145131.864 <sup>W</sup> | 27.1           | 1.13 × 10 <sup>-5</sup>        | 2.8      | 7     | } 139(24)                                    | —                                  | —                                   | —                | 5     |
| 3 <sub>2</sub> → 2 <sub>2</sub>              | A     | 145133.415 <sup>W</sup> | 51.6           | 6.89 × 10 <sup>-6</sup>        | 1.7      | 7     |                                              |                                    |                                     |                  |       |
| 3 <sub>-1</sub> → 2 <sub>-1</sub>            | A     | 146368.328 <sup>W</sup> | 28.6           | 1.13 × 10 <sup>-5</sup>        | 2.7      | 7     | 74(41)                                       | —                                  | —                                   | —                | 3     |
| 9 <sub>0</sub> → 8 <sub>1</sub>              | A     | 146618.697 <sup>W</sup> | 104.4          | 8.04 × 10 <sup>-6</sup>        | 2.1      | 19    | 92(26)                                       | —                                  | —                                   | —                | 3     |
| 6 <sub>2</sub> → 7 <sub>1</sub>              | A     | 156127.544 <sup>W</sup> | 86.5           | 6.74 × 10 <sup>-6</sup>        | 1.0      | 13    | 82(30)                                       | —                                  | —                                   | —                | 3     |
| 2 <sub>1</sub> → 3 <sub>0</sub>              | A     | 156602.395 <sup>W</sup> | 21.4           | 8.93 × 10 <sup>-6</sup>        | 0.5      | 5     | 149(35)                                      | —                                  | —                                   | —                | 4     |
| 7 <sub>0</sub> → 7 <sub>-1</sub>             | E     | 156828.517 <sup>W</sup> | 70.2           | 1.88 × 10 <sup>-5</sup>        | 3.1      | 15    | 61(17)                                       | —                                  | —                                   | —                | 2     |
| 6 <sub>0</sub> → 6 <sub>-1</sub>             | E     | 157048.617 <sup>W</sup> | 54.0           | 1.96 × 10 <sup>-5</sup>        | 2.8      | 13    | 82(27)                                       | —                                  | —                                   | —                | 3     |
| 1 <sub>0</sub> → 1 <sub>-1</sub>             | E     | 157270.832 <sup>W</sup> | 7.5            | 2.21 × 10 <sup>-5</sup>        | 0.7      | 3     |                                              |                                    |                                     |                  |       |
| 3 <sub>0</sub> → 3 <sub>-1</sub>             | E     | 157272.338 <sup>W</sup> | 19.2           | 2.15 × 10 <sup>-5</sup>        | 1.7      | 7     | } 355(53)                                    | —                                  | —                                   | —                | 8     |
| 2 <sub>0</sub> → 2 <sub>-1</sub>             | E     | 157276.019 <sup>W</sup> | 12.2           | 2.18 × 10 <sup>-5</sup>        | 1.2      | 5     |                                              |                                    |                                     |                  |       |
| 1 <sub>1</sub> → 1 <sub>0</sub>              | E     | 165050.175 <sup>W</sup> | 15.5           | 2.35 × 10 <sup>-5</sup>        | 0.7      | 3     | 56(22)                                       | —                                  | —                                   | —                | 2     |
| 2 <sub>1</sub> → 2 <sub>0</sub>              | E     | 165061.130 <sup>W</sup> | 20.1           | 2.34 × 10 <sup>-5</sup>        | 1.1      | 5     | 232(38)                                      | —                                  | —                                   | —                | 4     |
| 3 <sub>1</sub> → 3 <sub>0</sub>              | E     | 165099.240 <sup>W</sup> | 27.1           | 2.33 × 10 <sup>-5</sup>        | 1.6      | 7     | 170(28)                                      | —                                  | —                                   | —                | 6     |
| 4 <sub>1</sub> → 4 <sub>0</sub>              | E     | 165190.475 <sup>W</sup> | 36.4           | 2.32 × 10 <sup>-5</sup>        | 2.0      | 9     | 178(70)                                      | —                                  | —                                   | —                | 6     |
| 5 <sub>1</sub> → 5 <sub>0</sub>              | E     | 165369.341 <sup>W</sup> | 48.0           | 2.31 × 10 <sup>-5</sup>        | 2.4      | 11    | 127(25)                                      | —                                  | —                                   | —                | 4     |
| 6 <sub>1</sub> → 6 <sub>0</sub>              | E     | 165678.649 <sup>W</sup> | 61.9           | 2.29 × 10 <sup>-5</sup>        | 2.8      | 13    | 312(31)                                      | —                                  | —                                   | —                | 6     |
| 7 <sub>1</sub> → 7 <sub>0</sub>              | E     | 166169.098 <sup>W</sup> | 78.2           | 2.28 × 10 <sup>-5</sup>        | 3.2      | 15    | 102(23)                                      | —                                  | —                                   | —                | 4     |
| 3 <sub>2</sub> → 2 <sub>1</sub>              | E     | 170060.592 <sup>W</sup> | 28.3           | 2.55 × 10 <sup>-5</sup>        | 1.6      | 7     | 275(53)                                      | —                                  | —                                   | —                | 7     |
| 1 <sub>1</sub> → 2 <sub>0</sub>              | A     | 205791.270 <sup>F</sup> | 16.8           | 6.28 × 10 <sup>-5</sup>        | 0.9      | 3     | 47(16)                                       | 10.3(0.4)                          | 2.5(0.7)                            | 18               | 2     |
| 4 <sub>2</sub> → 3 <sub>1</sub>              | E     | 218440.063 <sup>F</sup> | 37.6           | 4.69 × 10 <sup>-5</sup>        | 1.7      | 9     | 180(10)                                      | 10.7(0.1)                          | 1.5(0.1)                            | 113              | 15    |
| 8 <sub>-1</sub> → 7 <sub>0</sub>             | E     | 229758.756 <sup>F</sup> | 81.2           | 4.19 × 10 <sup>-5</sup>        | 2.5      | 17    | 110(14)                                      | 10.7(0.1)                          | 1.5(0.1)                            | 69               | 5     |
| 5 <sub>1</sub> → 4 <sub>1</sub>              | A     | 239746.219 <sup>F</sup> | 49.1           | 5.66 × 10 <sup>-5</sup>        | 4.8      | 11    | 74(14)                                       | 10.4(0.1)                          | 1.4(0.1)                            | 53               | 3     |
| 5 <sub>0</sub> → 4 <sub>0</sub>              | E     | 241700.159 <sup>F</sup> | 40.0           | 6.04 × 10 <sup>-5</sup>        | 5.0      | 11    | 251(21)                                      | 10.8(0.1)                          | 2.6(0.3)                            | 90               | 7     |
| 5 <sub>-1</sub> → 4 <sub>-1</sub>            | E     | 241767.234 <sup>F</sup> | 32.5           | 5.81 × 10 <sup>-5</sup>        | 4.8      | 11    | 357(33)                                      | 10.4(0.2)                          | 1.9(0.1)                            | 224              | 15    |



Table B.10. continued.

| Transition                                      | Sym.* | Frequency               | $E_u/k$ | $A_{ul}$              | $S_{ul}$ | $g_u$ | $\int T_{MB} dv$  | $v_{LSR}$      | $\Delta v$     | $T_{MB}$ | $S/N$ |
|-------------------------------------------------|-------|-------------------------|---------|-----------------------|----------|-------|-------------------|----------------|----------------|----------|-------|
| $(J_{K_a, K_c})_u \rightarrow (J_{K_a, K_c})_l$ |       | [MHz]                   | [K]     | [ $s^{-1}$ ]          |          |       | [mK km $s^{-1}$ ] | [km $s^{-1}$ ] | [km $s^{-1}$ ] | [mK]     |       |
| $5_0 \rightarrow 4_0$                           | A     | 241791.352 <sup>F</sup> | 34.8    | $6.05 \times 10^{-5}$ | 5.0      | 11    | 646(43)           | 10.5(0.2)      | 2.2(0.2)       | 273      | 27    |
| $5_{-4} \rightarrow 4_{-4}$                     | E     | 241813.255 <sup>F</sup> | 114.8   | $2.18 \times 10^{-5}$ | 1.8      | 11    | 38(13)            | 10.7(0.2)      | 1.2(0.6)       | 28       | 2     |
| $5_1 \rightarrow 4_1$                           | E     | 241879.025 <sup>F</sup> | 48.0    | $5.96 \times 10^{-5}$ | 5.0      | 11    | 205(25)           | 10.5(0.3)      | 3.3(0.6)       | 56       | 7     |
| $5_{-2} \rightarrow 4_{-2}$                     | E     | 241904.147 <sup>F</sup> | 52.8    | $5.09 \times 10^{-5}$ | 4.2      | 11    | } 179(21)         | 10.5(0.1)      | 2.4(0.3)       | 67       | 7     |
| $5_2 \rightarrow 4_2$                           | E     | 241904.643 <sup>F</sup> | 49.2    | $5.03 \times 10^{-5}$ | 4.2      | 11    |                   |                |                |          |       |
| $5_{-1} \rightarrow 4_{-1}$                     | A     | 243915.788 <sup>F</sup> | 49.7    | $5.97 \times 10^{-5}$ | 4.8      | 11    | 72(13)            | 10.8(0.1)      | 0.7(0.2)       | 99       | 7     |
| $2_1 \rightarrow 1_0$                           | E     | 261805.675 <sup>F</sup> | 20.1    | $5.57 \times 10^{-5}$ | 0.7      | 5     | 143(10)           | 10.7(0.1)      | 1.5(0.1)       | 89       | 7     |
| $5_2 \rightarrow 4_1$                           | E     | 266838.148 <sup>F</sup> | 49.2    | $7.74 \times 10^{-5}$ | 1.9      | 11    | 225(12)           | 10.7(0.1)      | 1.7(0.1)       | 124      | 10    |
| $9_{-1} \rightarrow 8_0$                        | E     | 278304.512 <sup>F</sup> | 102.1   | $7.69 \times 10^{-5}$ | 2.9      | 19    | 96(9)             | 10.7(0.1)      | 0.9(0.2)       | 100      | 10    |
| $6_1 \rightarrow 5_1$                           | A     | 287670.767 <sup>F</sup> | 62.9    | $1.01 \times 10^{-4}$ | 5.9      | 13    | 80(9)             | 10.8(0.2)      | 1.8(0.1)       | 42       | 3     |
| $6_{-1} \rightarrow 5_{-1}$                     | A     | 292672.889 <sup>F</sup> | 63.7    | $1.06 \times 10^{-4}$ | 5.9      | 13    | 82(23)            | 10.8(0.1)      | 0.9(0.2)       | 90       | 10    |
| $3_0 \rightarrow 2_{-1}$                        | E     | 302369.773 <sup>F</sup> | 19.2    | $4.66 \times 10^{-5}$ | 0.5      | 7     | 34(14)            | 10.0(0.1)      | 0.4(0.2)       | 84       | 3     |
| $1_{-1} \rightarrow 1_0$                        | A     | 303366.921 <sup>F</sup> | 16.9    | $2.26 \times 10^{-4}$ | 1.0      | 3     | 171(14)           | 10.5(0.1)      | 1.8(0.1)       | 89       | 5     |
| $2_{-1} \rightarrow 2_0$                        | A     | 304208.348 <sup>F</sup> | 21.6    | $2.12 \times 10^{-4}$ | 1.6      | 5     | 228(14)           | 10.3(0.1)      | 1.6(0.1)       | 134      | 7     |
| $7_0 \rightarrow 6_0$                           | E     | 338124.488 <sup>F</sup> | 70.2    | $1.70 \times 10^{-4}$ | 7.0      | 15    | 174(53)           | 10.5(0.2)      | 1.6(0.6)       | 101      | 3     |
| $7_{-1} \rightarrow 6_{-1}$                     | E     | 338344.588 <sup>F</sup> | 62.7    | $1.67 \times 10^{-4}$ | 6.9      | 15    | 260(64)           | 10.7(0.1)      | 1.5(0.2)       | 235      | 11    |
| $7_0 \rightarrow 6_0$                           | A     | 338408.698 <sup>F</sup> | 65.0    | $1.70 \times 10^{-4}$ | 7.0      | 15    | 440(69)           | 10.7(0.1)      | 1.6(0.1)       | 259      | 12    |
| $7_3 \rightarrow 6_3$                           | E     | 338583.216 <sup>F</sup> | 104.8   | $1.39 \times 10^{-4}$ | 5.8      | 15    | 59(20)            | 11.0(0.1)      | 0.4(0.1)       | 133      | 3     |
| $7_2 \rightarrow 6_2$                           | E     | 338721.693 <sup>F</sup> | 79.4    | $1.55 \times 10^{-4}$ | 6.4      | 15    | } 161(22)         | 10.5(0.1)      | 1.3(0.1)       | 117      | 3     |
| $7_{-2} \rightarrow 6_{-2}$                     | E     | 338722.898 <sup>F</sup> | 83.0    | $1.57 \times 10^{-4}$ | 6.5      | 15    |                   |                |                |          |       |

Notes. Frequencies,  $E_u/k$ ,  $A_{ul}$ ,  $S_{ul}$ , and  $g_u$  from JPL catalogue.

Table B.11. Line parameters of CH<sub>3</sub>CHO.

| Transition                                      | Sym.* | Frequency               | $E_u/k$ | $A_{ul}$              | $S_{ul}$ | $g_u$ | $\int T_{MB} dv$  | $v_{LSR}$      | $\Delta v$     | $T_{MB}$ | $S/N$ |
|-------------------------------------------------|-------|-------------------------|---------|-----------------------|----------|-------|-------------------|----------------|----------------|----------|-------|
| $(J_{K_a, K_c})_u \rightarrow (J_{K_a, K_c})_l$ |       | [MHz]                   | [K]     | [ $s^{-1}$ ]          |          |       | [mK km $s^{-1}$ ] | [km $s^{-1}$ ] | [km $s^{-1}$ ] | [mK]     |       |
| $5_{1,5} \rightarrow 4_{1,4}$                   | A     | 93580.909 <sup>F</sup>  | 15.7    | $2.63 \times 10^{-5}$ | 5.2      | 11    | 60(6)             | 10.4(0.1)      | 2.7(0.3)       | 21       | 6     |
| $5_{1,5} \rightarrow 4_{1,4}$                   | E     | 93595.235 <sup>F</sup>  | 15.7    | $2.63 \times 10^{-5}$ | 5.2      | 11    | 51(7)             | 10.8(0.2)      | 2.3(0.4)       | 21       | 6     |
| $5_{0,5} \rightarrow 4_{0,4}$                   | E     | 95947.437 <sup>F</sup>  | 13.8    | $2.96 \times 10^{-5}$ | 5.4      | 11    | 29(6)             | 10.7(0.3)      | 2.0(0.4)       | 13       | 3     |
| $5_{0,5} \rightarrow 4_{0,4}$                   | A     | 95963.459 <sup>F</sup>  | 13.8    | $2.95 \times 10^{-5}$ | 5.4      | 11    | 54(13)            | 10.7(0.2)      | 2.0(0.5)       | 25       | 3     |
| $5_{1,4} \rightarrow 4_{1,3}$                   | E     | 98863.314 <sup>F</sup>  | 16.5    | $3.10 \times 10^{-5}$ | 5.2      | 11    | 79(6)             | 11.1(0.3)      | 2.9(0.5)       | 26       | 3     |
| $5_{1,4} \rightarrow 4_{1,3}$                   | A     | 98900.944 <sup>F</sup>  | 16.5    | $3.11 \times 10^{-5}$ | 5.2      | 11    | 63(10)            | 11.1(0.1)      | 1.6(0.3)       | 38       | 7     |
| $6_{1,6} \rightarrow 5_{1,5}$                   | A     | 112248.716 <sup>F</sup> | 21.1    | $4.67 \times 10^{-5}$ | 6.3      | 13    | 57(10)            | 10.7(0.2)      | 2.0(0.3)       | 27       | 5     |
| $6_{1,6} \rightarrow 5_{1,5}$                   | E     | 112254.508 <sup>F</sup> | 21.1    | $4.67 \times 10^{-5}$ | 6.3      | 13    | 46(11)            | 11.2(0.2)      | 1.9(0.5)       | 23       | 4     |
| $6_{0,6} \rightarrow 5_{0,5}$                   | E     | 114940.175 <sup>F</sup> | 19.4    | $5.16 \times 10^{-5}$ | 6.5      | 13    | 95(18)            | 11.0(0.2)      | 2.2(0.5)       | 40       | 4     |
| $6_{0,6} \rightarrow 5_{0,5}$                   | A     | 114959.902 <sup>F</sup> | 19.4    | $5.15 \times 10^{-5}$ | 6.5      | 13    | 106(15)           | 10.6(0.1)      | 2.0(0.3)       | 49       | 5     |
| $7_{1,7} \rightarrow 6_{1,6}$                   | A     | 130891.821 <sup>W</sup> | 27.4    | $7.54 \times 10^{-5}$ | 7.4      | 15    | } 135(44)         | —              | —              | —        | 4     |
| $7_{1,7} \rightarrow 6_{1,6}$                   | E     | 130892.749 <sup>W</sup> | 27.4    | $7.55 \times 10^{-5}$ | 7.4      | 15    |                   |                |                |          |       |

Table B.11. continued.

| Transition<br>( $J_{K_a, K_c})_u \rightarrow (J_{K_a, K_c})_l$ | Sym.* | Frequency<br>[MHz]        | $E_u/k$<br>[K] | $A_{ul}$<br>[s <sup>-1</sup> ] | $S_{ul}$ | $g_u$ | $\int T_{MB} dv$<br>[mK km s <sup>-1</sup> ] | $v_{LSR}$<br>[km s <sup>-1</sup> ] | $\Delta v$<br>[km s <sup>-1</sup> ] | $T_{MB}$<br>[mK] | S/N |
|----------------------------------------------------------------|-------|---------------------------|----------------|--------------------------------|----------|-------|----------------------------------------------|------------------------------------|-------------------------------------|------------------|-----|
| 7 <sub>1,6</sub> → 6 <sub>1,5</sub>                            | A     | 138319.628 <sup>W</sup>   | 28.8           | $8.90 \times 10^{-5}$          | 7.4      | 15    | 166(62)                                      | —                                  | —                                   | —                | 3   |
| 8 <sub>1,8</sub> → 7 <sub>1,7</sub>                            | E     | 149505.128 <sup>W</sup>   | 34.6           | $1.14 \times 10^{-4}$          | 8.5      | 17    | } 193(96)                                    | —                                  | —                                   | —                | 2   |
| 8 <sub>1,8</sub> → 7 <sub>1,7</sub>                            | A     | 149507.462 <sup>W</sup>   | 34.6           | $1.14 \times 10^{-4}$          | 8.5      | 17    |                                              |                                    |                                     |                  |     |
| 8 <sub>0,8</sub> → 7 <sub>0,7</sub>                            | E     | 152607.614 <sup>W</sup>   | 33.1           | $1.23 \times 10^{-4}$          | 8.6      | 17    | 184(74)                                      | —                                  | —                                   | —                | 4   |
| 8 <sub>1,7</sub> → 7 <sub>1,6</sub>                            | E     | 157937.697 <sup>W</sup>   | 36.4           | $1.34 \times 10^{-4}$          | 8.5      | 17    | 86(21)                                       | —                                  | —                                   | —                | 4   |
| 8 <sub>1,7</sub> → 7 <sub>1,6</sub>                            | A     | 157974.590 <sup>W</sup>   | 36.4           | $1.34 \times 10^{-4}$          | 8.5      | 17    | 105(24)                                      | —                                  | —                                   | —                | 6   |
| 9 <sub>1,9</sub> → 8 <sub>1,8</sub>                            | E     | 168088.618 <sup>W</sup>   | 42.6           | $1.64 \times 10^{-4}$          | 9.6      | 19    | } 98(36)                                     | —                                  | —                                   | —                | 3   |
| 9 <sub>1,9</sub> → 8 <sub>1,8</sub>                            | A     | 168093.444 <sup>W</sup>   | 42.7           | $1.64 \times 10^{-4}$          | 9.6      | 19    |                                              |                                    |                                     |                  |     |
| 9 <sub>0,9</sub> → 8 <sub>0,8</sub>                            | A     | 171296.985 <sup>W</sup>   | 41.3           | $1.75 \times 10^{-4}$          | 9.7      | 19    | 158(92)                                      | —                                  | —                                   | —                | 2   |
| 11 <sub>1,11</sub> → 10 <sub>1,10</sub>                        | E     | 205161.898 <sup>F</sup>   | 61.4           | $3.02 \times 10^{-4}$          | 11.7     | 23    | 74(10)                                       | 10.6(0.2)                          | 2.4(0.3)                            | 29               | 4   |
| 11 <sub>1,11</sub> → 10 <sub>1,10</sub>                        | A     | 205170.686 <sup>F,B</sup> | 61.5           | $3.01 \times 10^{-4}$          | 11.7     | 23    | —                                            | —                                  | —                                   | —                | —   |
| 11 <sub>0,11</sub> → 10 <sub>0,10</sub>                        | A     | 208267.045 <sup>F</sup>   | 60.4           | $3.17 \times 10^{-4}$          | 11.8     | 23    | 62(9)                                        | 10.6(0.1)                          | 1.8(0.3)                            | 33               | 5   |
| 11 <sub>1,10</sub> → 10 <sub>1,9</sub>                         | E     | 216581.930 <sup>F</sup>   | 64.8           | $3.55 \times 10^{-4}$          | 11.7     | 23    | 47(10)                                       | 10.7(0.2)                          | 1.4(0.5)                            | 32               | 5   |
| 11 <sub>1,10</sub> → 10 <sub>1,9</sub>                         | A     | 216630.234 <sup>F</sup>   | 64.8           | $3.55 \times 10^{-4}$          | 11.7     | 23    | 53(7)                                        | 10.7(0.1)                          | 1.5(0.2)                            | 33               | 5   |
| 12 <sub>1,12</sub> → 11 <sub>1,11</sub>                        | E     | 223650.093 <sup>F</sup>   | 72.2           | $3.92 \times 10^{-4}$          | 12.8     | 25    | 68(9)                                        | 10.8(0.1)                          | 1.9(0.3)                            | 34               | 6   |
| 12 <sub>1,12</sub> → 11 <sub>1,11</sub>                        | A     | 223660.603 <sup>F</sup>   | 72.2           | $3.92 \times 10^{-4}$          | 12.8     | 25    | 58(11)                                       | 10.7(0.2)                          | 2.2(0.5)                            | 24               | 4   |
| 12 <sub>0,12</sub> → 11 <sub>0,11</sub>                        | E     | 226551.622 <sup>F</sup>   | 71.3           | $4.10 \times 10^{-4}$          | 12.9     | 25    | 114(6)                                       | 10.5(0.3)                          | 2.5(0.5)                            | 43               | 6   |
| 12 <sub>0,12</sub> → 11 <sub>0,11</sub>                        | A     | 226592.725 <sup>F</sup>   | 71.3           | $4.10 \times 10^{-4}$          | 12.9     | 25    | 54(15)                                       | 11.4(0.1)                          | 1.0(0.4)                            | 50               | 4   |
| 12 <sub>1,11</sub> → 11 <sub>1,10</sub>                        | E     | 235996.212 <sup>F</sup>   | 76.1           | $4.61 \times 10^{-4}$          | 12.8     | 25    | 77(23)                                       | 10.8(0.3)                          | 2.0(0.8)                            | 36               | 3   |
| 12 <sub>1,11</sub> → 11 <sub>1,10</sub>                        | A     | 236049.131 <sup>F</sup>   | 76.1           | $4.61 \times 10^{-4}$          | 12.8     | 25    | 39(15)                                       | 10.8(0.2)                          | 1.0(0.5)                            | 38               | 3   |
| 13 <sub>1,13</sub> → 12 <sub>1,12</sub>                        | A     | 242118.136 <sup>F</sup>   | 83.8           | $5.00 \times 10^{-4}$          | 13.9     | 27    | 43(17)                                       | 10.0(0.5)                          | 2.5(1.3)                            | 16               | 2   |
| 13 <sub>0,13</sub> → 12 <sub>0,12</sub>                        | A     | 244832.176 <sup>F</sup>   | 83.1           | $5.18 \times 10^{-4}$          | 13.9     | 27    | 48(10)                                       | 11.5(0.1)                          | 1.2(0.3)                            | 39               | 3   |
| 13 <sub>1,12</sub> → 12 <sub>1,11</sub>                        | E     | 255326.968 <sup>F</sup>   | 88.4           | $5.86 \times 10^{-4}$          | 13.9     | 27    | 65(13)                                       | 10.9(0.2)                          | 2.0(0.5)                            | 30               | 5   |
| 13 <sub>1,12</sub> → 12 <sub>1,11</sub>                        | A     | 255384.754 <sup>F</sup>   | 88.4           | $5.86 \times 10^{-4}$          | 13.9     | 27    | 67(10)                                       | 10.6(0.1)                          | 1.8(0.3)                            | 34               | 6   |
| 14 <sub>0,14</sub> → 13 <sub>0,13</sub>                        | E     | 262960.097 <sup>F</sup>   | 95.7           | $6.44 \times 10^{-4}$          | 15.0     | 29    | 32(7)                                        | 10.5(0.2)                          | 1.3(0.3)                            | 23               | 4   |
| 14 <sub>1,13</sub> → 13 <sub>1,12</sub>                        | E     | 274563.412 <sup>F</sup>   | 101.5          | $7.31 \times 10^{-4}$          | 15.0     | 29    | 38(11)                                       | 10.9(0.2)                          | 1.0(0.3)                            | 35               | 2   |
| 15 <sub>1,15</sub> → 14 <sub>1,14</sub>                        | A     | 278939.438 <sup>F</sup>   | 109.7          | $7.69 \times 10^{-4}$          | 16.1     | 31    | 22(7)                                        | 10.5(0.2)                          | 1.0(0.4)                            | 23               | 3   |
| 15 <sub>0,15</sub> → 14 <sub>0,14</sub>                        | A     | 281126.944 <sup>F</sup>   | 109.2          | $7.88 \times 10^{-4}$          | 16.1     | 31    | 29(11)                                       | 10.7(0.3)                          | 1.4(0.5)                            | 19               | 2   |

Notes. <sup>B</sup> Blended with CF<sup>+</sup> 2 → 1. Frequencies,  $E_u/k$ ,  $A_{ul}$ ,  $S_{ul}$ , and  $g_u$  from JPL catalogue.
